# Supplementary material for: Development of a Rapid Epstein–Barr Virus Detection System Based on Recombinase Polymerase Amplification and a Lateral Flow Assay
Source: MDPI journal article supplement (doi:10.3390/v16010106), 2024-01-11
Supplement: s1 [file s1]

# Supplementary Material

**Table S1-1 Cell lines used for experiments**

| Number | Cell line                       | Number | Cell line |
|--------|---------------------------------|--------|-----------|
| 1      | 104C1                           | 26     | BEAS-2B   |
| 2      | 143B/TK-                        | 27     | BeWo      |
| 3      | 293                             | 28     | BHK21     |
| 4      | 293T                            | 29     | BS-C-1    |
| 5      | 3T3-L1                          | 30     | BT        |
| 6      | 4T1                             | 31     | BV-173    |
| 7      | 769-P                           | 32     | C-33 A    |
| 8      | 786-O                           | 33     | CA46      |
| 9      | A-204                           | 34     | Caco-2    |
| 10     | A-431                           | 35     | Caov-3    |
| 11     | A549                            | 36     | CCRF-CEM  |
| 12     | A875                            | 37     | CCRF-SB   |
| 13     | A9                              | 38     | CFPAC-1   |
| 14     | ACHN                            | 39     | CHO/dhFr- |
| 15     | Aedes albopictus clone<br>C6/36 | 40     | CHO-K1    |
| 16     | AN3 CA                          | 41     | CHSE-214  |
| 17     | Anglne                          | 42     | CIK       |
| 18     | ARH-77                          | 43     | COC1      |
| 19     | B16-F0                          | 44     | COC1/DDP  |
| 20     | B16-F1                          | 45     | CRFK      |
| 21     | B6YH4                           | 46     | Daudi     |
| 22     | B82                             | 47     | DLD-1     |
| 23     | B95-8                           | 48     | DMS 153   |
| 24     | BALB/3T3 clone A31              | 49     | EAC       |
| 25     | BC-3                            | 50     | EL-4-B5   |

**Table S1-2 Cell lines used for experiments**

| <b>Number</b> | <b>Cell line</b> | <b>Number</b> | <b>Cell line</b>      |
|---------------|------------------|---------------|-----------------------|
| 51            | EPC              | 76            | Hep-G2/2.2.15         |
| 52            | ES-2             | 77            | HIC                   |
| 53            | Farage           | 78            | Hi-five(BTI-Tn-5B1-4) |
| 54            | FG               | 79            | HK-2                  |
| 55            | FRhk-4           | 80            | HL-60                 |
| 56            | GIC              | 81            | HOS                   |
| 57            | H22              | 82            | Hs 578T               |
| 58            | H22-H8D8         | 83            | Hs 746T               |
| 59            | H4               | 84            | Hs68                  |
| 60            | H-4-II-E         | 85            | HT-29                 |
| 61            | H9               | 86            | HTR-8                 |
| 62            | H9C2             | 87            | Huh-7                 |
| 63            | HaCaT            | 88            | IBRS-2                |
| 64            | HBZY-1           | 89            | IMR-32                |
| 65            | HCT 116          | 90            | J774A.1               |
| 66            | HCT-15           | 91            | J82                   |
| 67            | HCT-8            | 92            | Jurkat,cloneE6-1      |
| 68            | HEC-1-B          | 93            | JVM-2                 |
| 69            | HEL              | 94            | K-562                 |
| 70            | HeLa             | 95            | KATO III              |
| 71            | HeLa 229         | 96            | KG-1a                 |
| 72            | HeLa S3          | 97            | KHOS-240S             |
| 73            | Hep 3B2.1-7      | 98            | KLE                   |
| 74            | Hep G2           | 99            | KMB-17                |
| 75            | Hepa 1-6         | 100           | L1210                 |

**Table S1-3 Cell lines used for experiments**

| <b>Number</b> | <b>Cell line</b> | <b>Number</b> | <b>Cell line</b>     |
|---------------|------------------|---------------|----------------------|
| 101           | L8824            | 126           | NCI-H292             |
| 102           | L929             | 127           | NCI-H929             |
| 103           | LLC-MK2          | 128           | NG108                |
| 104           | LLC-PK1          | 129           | NIH/3T3              |
| 105           | LLC-WRC 256      | 130           | NIH:OVCA-3           |
| 106           | L-M(TK-)         | 131           | NK-92                |
| 107           | LNCaP            | 132           | NRK                  |
| 108           | LS 174T          | 133           | OCI-AML3             |
| 109           | M2-10B4          | 134           | P3/NSI/1-Ag4-1[NS-1] |
| 110           | MA-104           | 135           | P3X63Ag8.653         |
| 111           | MA782/5s-8101    | 136           | P815                 |
| 112           | MADB106          | 137           | PA317                |
| 113           | MC/CAR           | 138           | PANC-1               |
| 114           | MC3T3-E1         | 139           | PC-12                |
| 115           | MCF-7            | 140           | PC-3                 |
| 116           | MDA-MB-435S      | 141           | PCK                  |
| 117           | MDBK             | 142           | PG-4(S+L-)           |
| 118           | MDCK(NBL-2)      | 143           | PK-15                |
| 119           | MG-63            | 144           | PT67                 |
| 120           | MGC803-1         | 145           | Raji                 |
| 121           | MIA PaCa-2       | 146           | RD                   |
| 122           | MKN45            | 147           | RH-30                |
| 123           | MOLT-4           | 148           | RIN-m5F              |
| 124           | MRC-5            | 149           | RK13                 |
| 125           | MV3              | 150           | RWPE-2               |

**Table S1-4 Cell lines used for experiments**

| <b>Number</b> | <b>Cell line</b> | <b>Number</b> | <b>Cell line</b>        |
|---------------|------------------|---------------|-------------------------|
| 151           | S-180            | 176           | T24                     |
| 152           | S180-S2D9        | 177           | T-47D                   |
| 153           | Saos-2           | 178           | Tb 1 Lu                 |
| 154           | SH-SY5Y          | 179           | TF-1                    |
| 155           | SiHa             | 180           | TM4                     |
| 156           | SJSA-1           | 181           | TT                      |
| 157           | SK-6             | 182           | U14-GFP                 |
| 158           | SK-BR-3          | 183           | U-2 OS                  |
| 159           | SK-HEP-1         | 184           | U-251MG                 |
| 160           | SK-MES-1         | 185           | U266B1                  |
| 161           | SK-N-SH          | 186           | U-87MG                  |
| 162           | SK-OV-3          | 187           | U-937                   |
| 163           | Sp2/0-Ag14       | 188           | Vero                    |
| 164           | ST               | 189           | Vero E6                 |
| 165           | STO              | 190           | WEHI 164                |
| 166           | SU-DHL-10        | 191           | WI-38 VA-13 subline 2RA |
| 167           | SU-DHL-6         | 192           | YAC-1                   |
| 168           | sVEC4-10         |               |                         |
| 169           | SVP              |               |                         |
| 170           | SW 1990          |               |                         |
| 171           | SW 626           |               |                         |
| 172           | SW1116           |               |                         |
| 173           | SW1353           |               |                         |
| 174           | SW480            |               |                         |
| 175           | SYF              |               |                         |

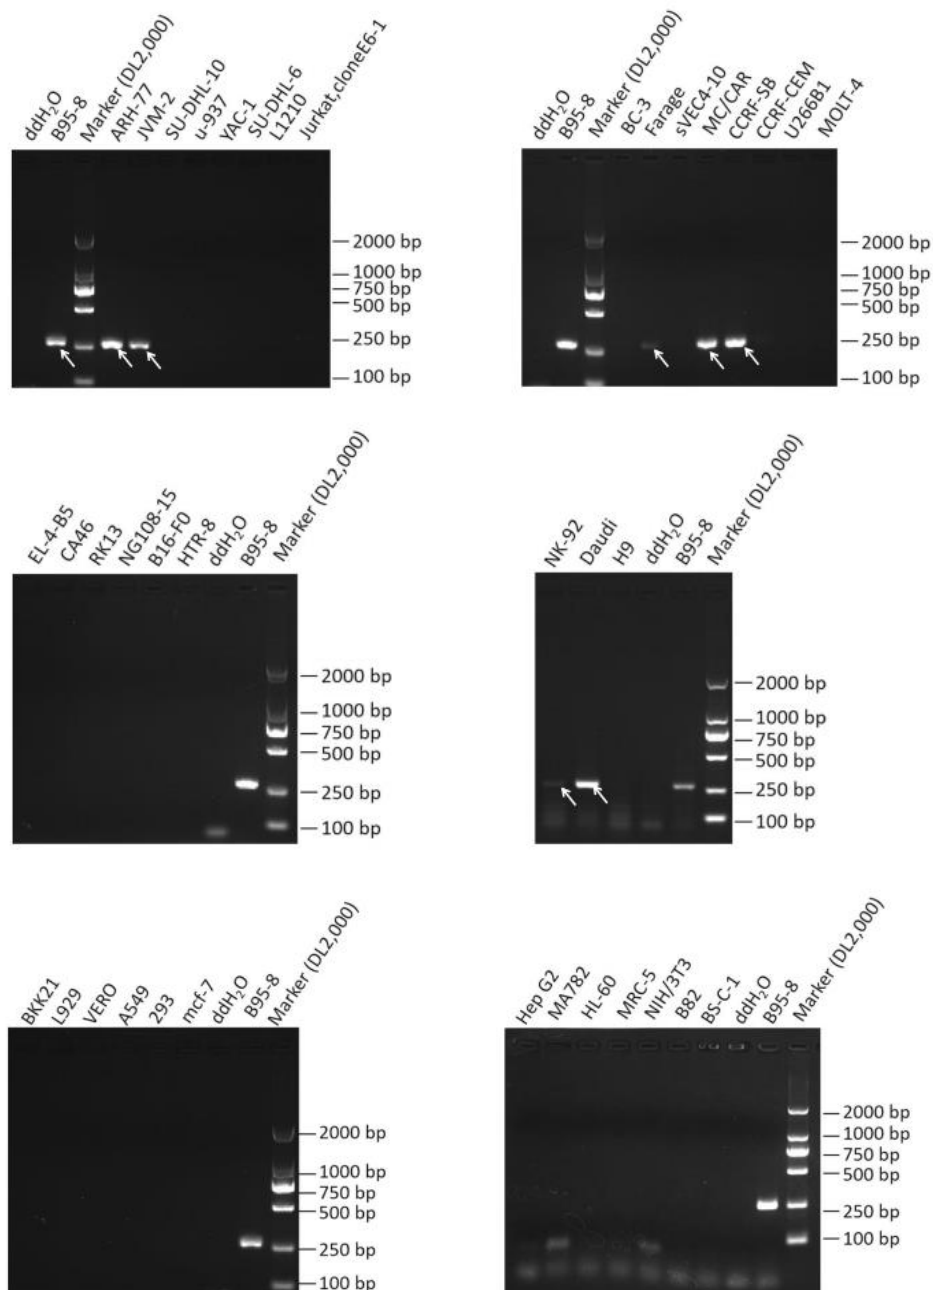

**Figure S1-1 PCR system detection EBV agarose gel electropherogram**

Positive cell lines: B95-8、ARH-77、JVM-2、Farage、MC/CAR、CCRF-SB、NK-92、Daudi

PS: B95-8 appears multiple times as a positive control, indicated only by an arrow once.

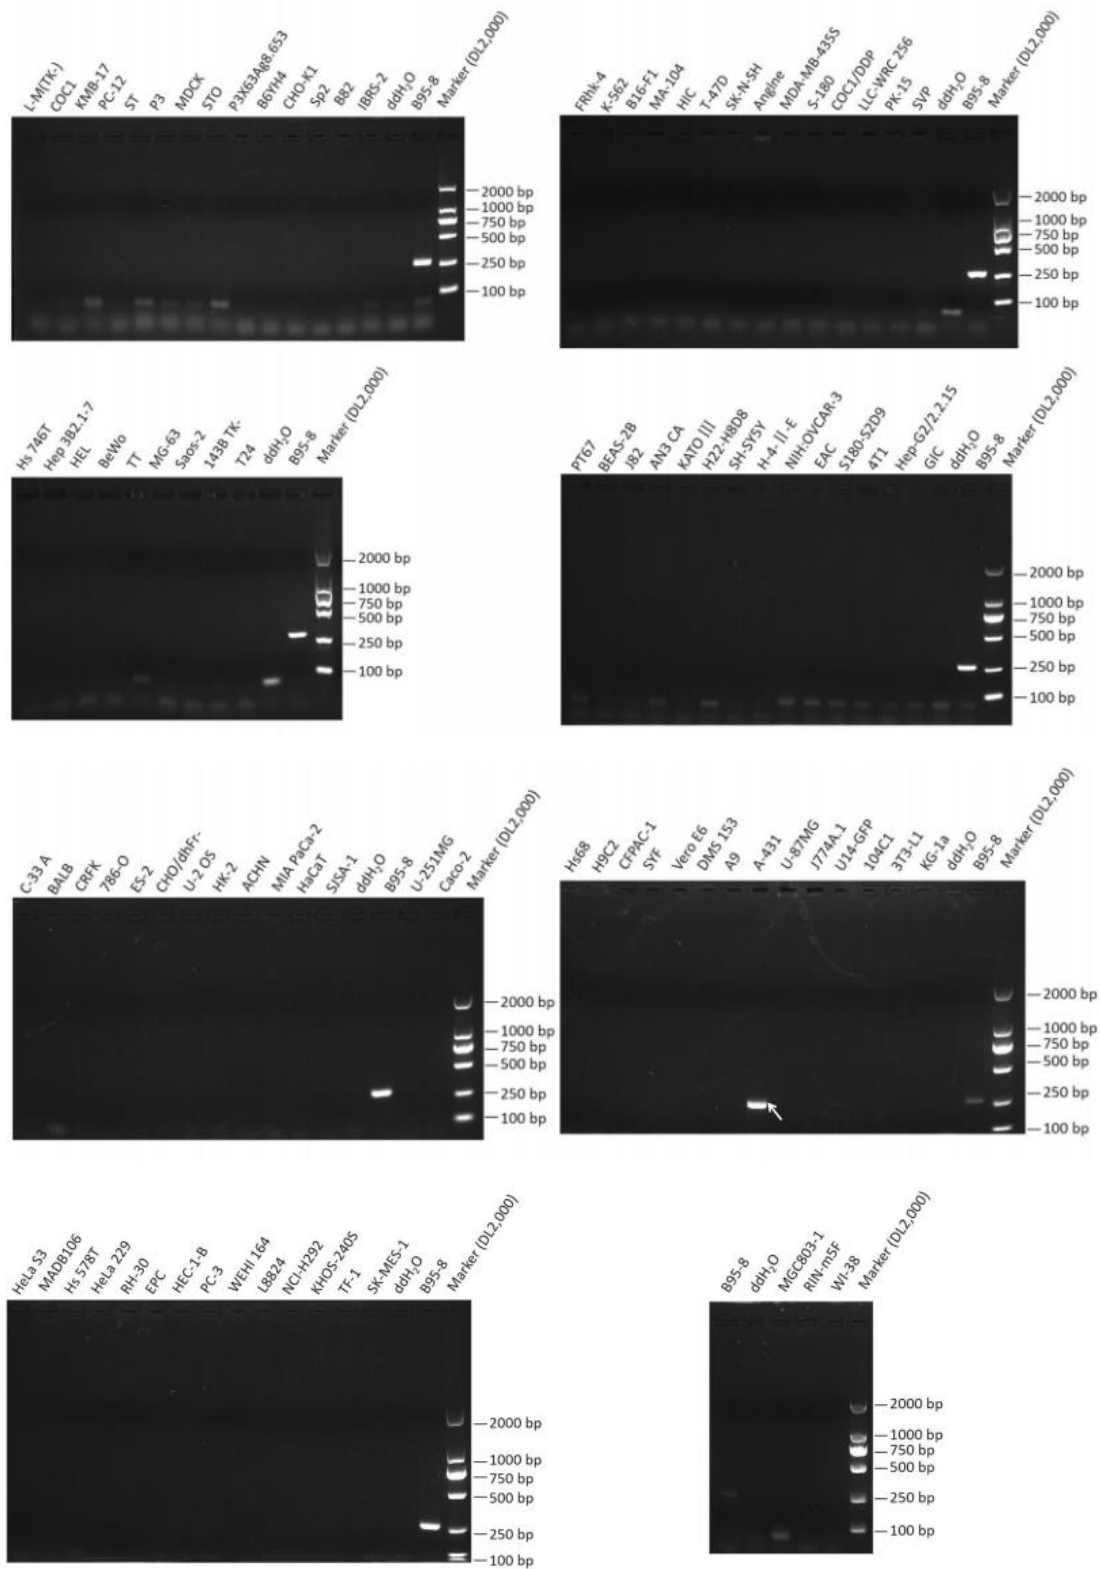

**Figure S1-2 PCR system detection EBV agarose gel electropherogram**

Positive cell lines: A-431

PS: B95-8 appears multiple times as a positive control, indicated only by an arrow once.

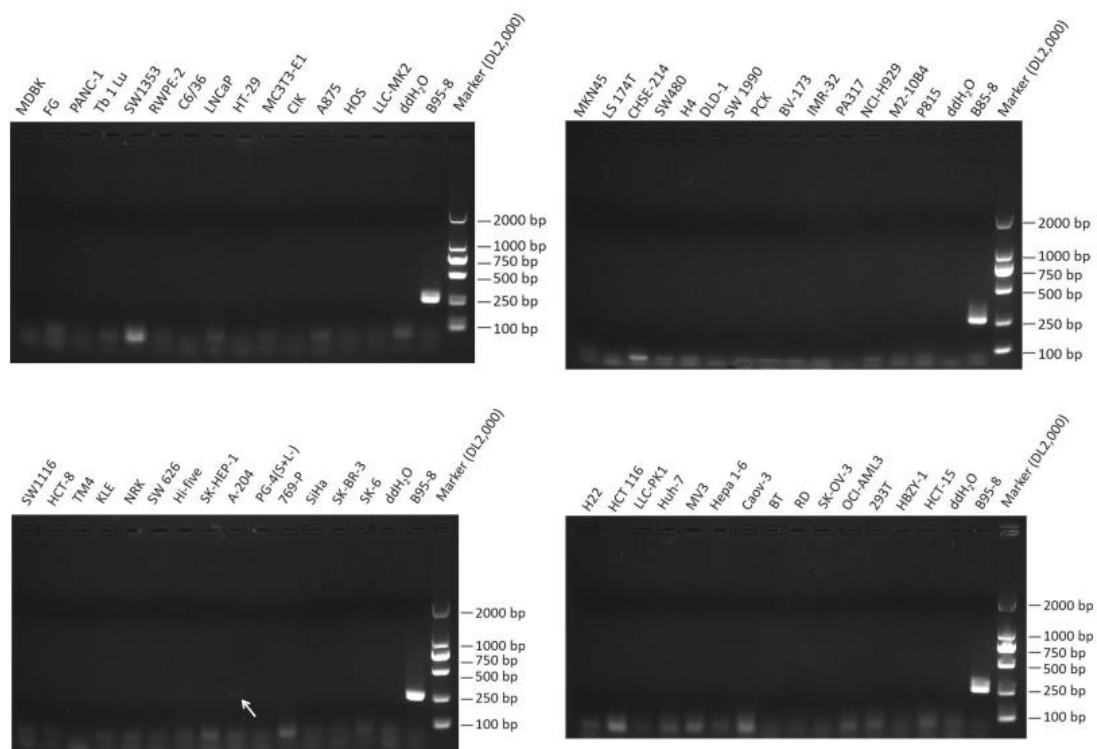

**Figure S1-3 PCR system detection EBV agarose gel electropherogram**

Positive cell lines: A-204

PS: B95-8 appears multiple times as a positive control, indicated only by an arrow once.

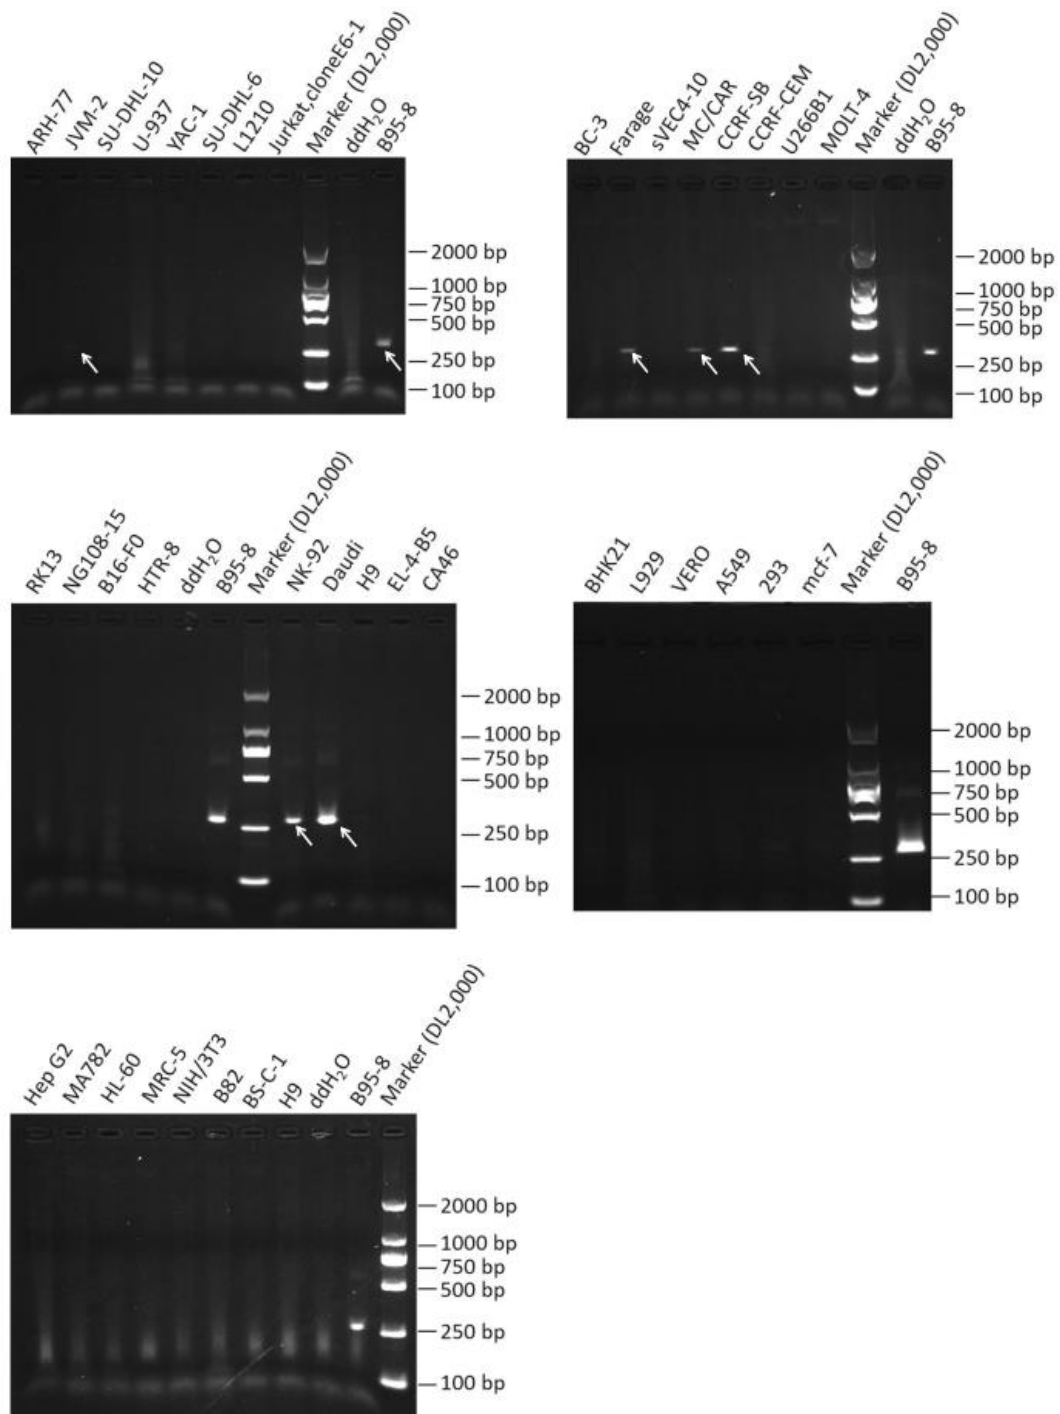

**Figure 2-1 RPA system detection EBV agarose gel electropherogram**

Positive cell lines: JVM-2、B95-8、Farage、MC/CAR、CCRF-SB、NK-92、Daudi  
 PS: B95-8 appears multiple times as a positive control, indicated only by an arrow once.



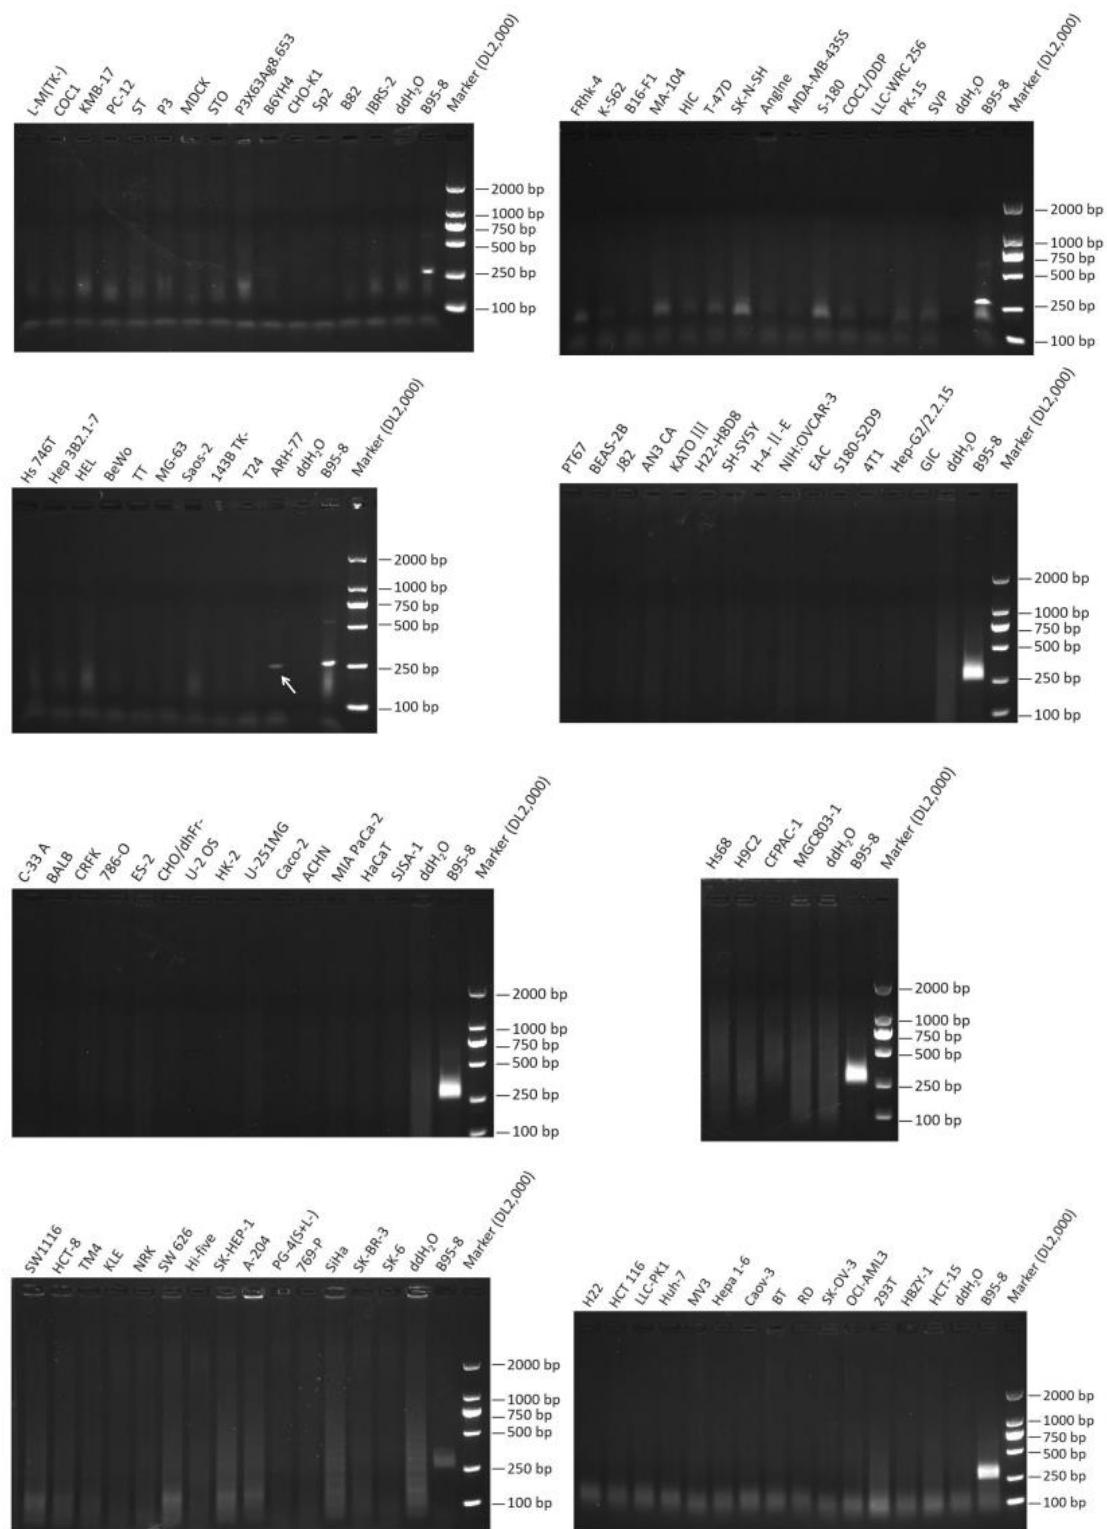

**Figure S2-2 RPA system detection EBV agarose gel electropherogram**

Positive cell lines: ARH-77

PS: B95-8 appears multiple times as a positive control, indicated only by an arrow once.

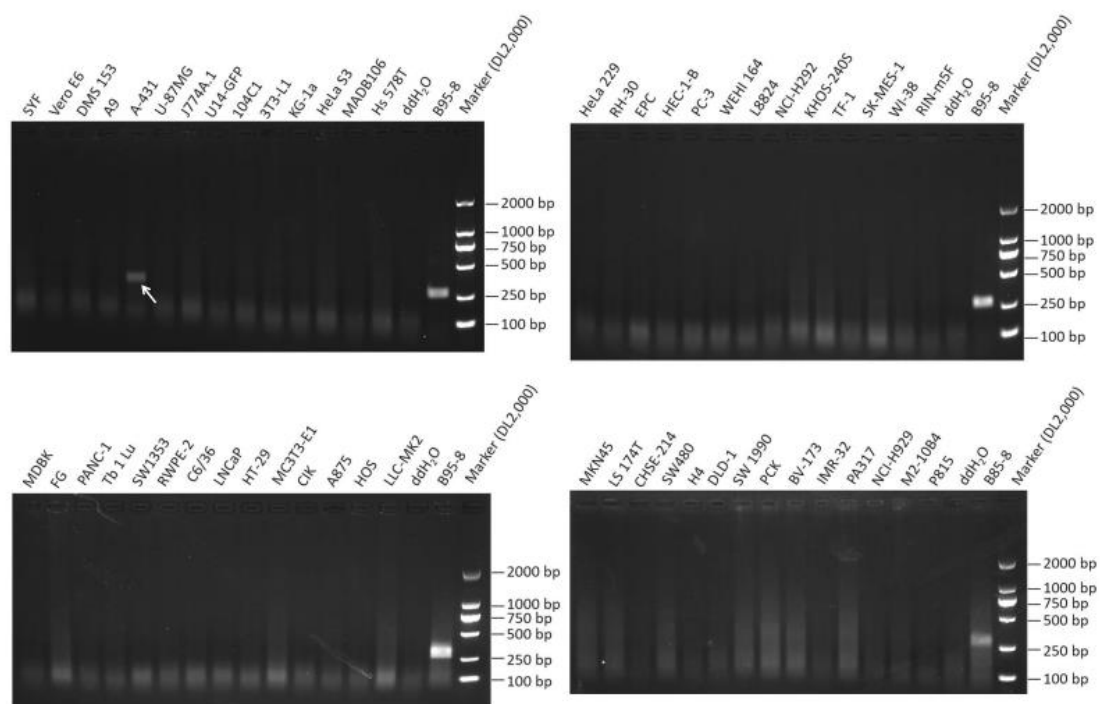

**Figure S2-3 RPA system detection EBV agarose gel electropherogram**

Positive cell lines: A-431

PS: B95-8 appears multiple times as a positive control, indicated only by an arrow once.

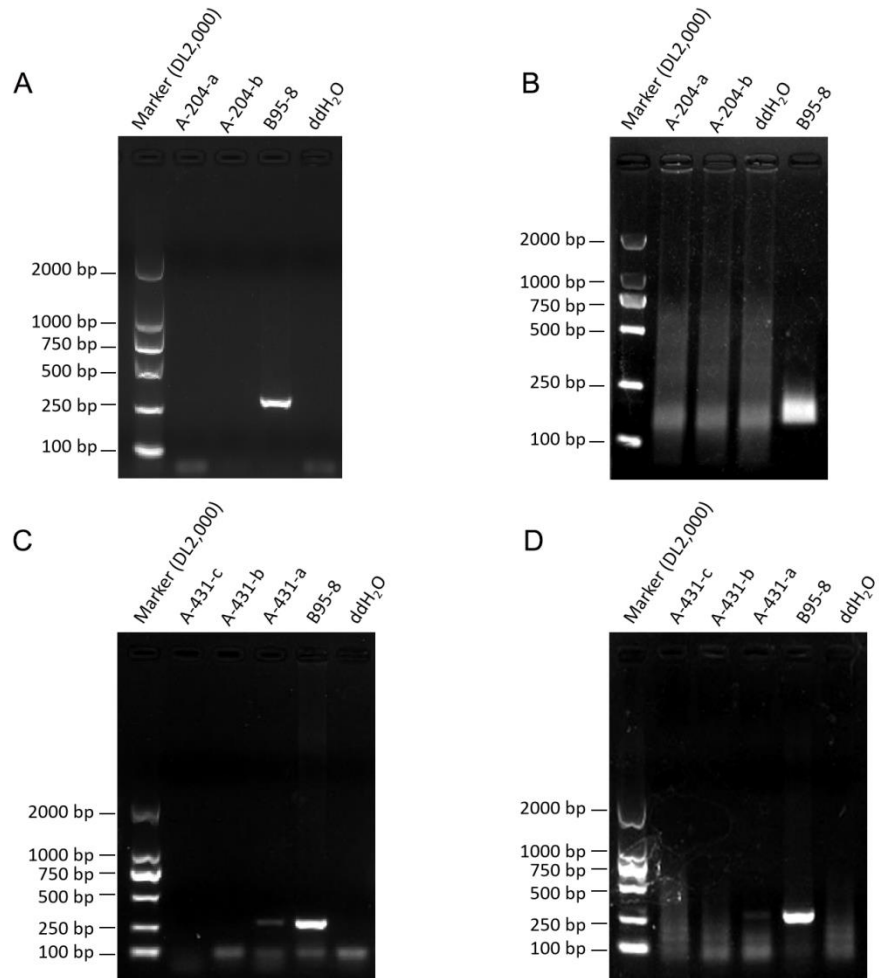

**Figure S3 Detection of EBV in A-204 & A-431 cells by agarose gel electrophoresis**

(A) PCR detection of EBV in different batches of A-204. (B) RPA detection of EBV in different batches of A-204. (C) PCR detection of EBV in different batches of A-431. (D) RPA detection of EBV in different batches of A-431.

PS: a, b and c respectively represent different batches

### **Sequencing Results of EBV Standard Plasmid Fragment**

5'-CGGTCTGCGACAGATCGGATTACCGGTCCATGCACGTGTCCGACTACGG  
CTATAACGAAGCAA-3'
